# Supplementary material for: In situ profiling reveals metabolic alterations in the tumor microenvironment of ovarian cancer after chemotherapy
Source: PubMed Central journal article supplement (PMC10624842; doi:10.1038/s41698-023-00454-0), 2023-11-03
Supplement: 41698_2023_454_MOESM2_ESM.pdf [file 41698_2023_454_MOESM2_ESM.pdf]

Corresponding author(s):

\_\_\_\_\_

Last updated by author(s):

YYYY-MM-DD \_\_\_\_\_

## Reporting Summary

Nature Portfolio wishes to improve the reproducibility of the work that we publish. This form provides structure for consistency and transparency in reporting. For further information on Nature Portfolio policies, see our [Editorial Policies](#) and the [Editorial Policy Checklist](#).

### Statistics

For all statistical analyses, confirm that the following items are present in the figure legend, table legend, main text, or Methods section.

- | n/a                                 | Confirmed                                                                                                                                                                                                                                                                                      |
|-------------------------------------|------------------------------------------------------------------------------------------------------------------------------------------------------------------------------------------------------------------------------------------------------------------------------------------------|
| <input type="checkbox"/>            | <input checked="" type="checkbox"/> The exact sample size ( $n$ ) for each experimental group/condition, given as a discrete number and unit of measurement                                                                                                                                    |
| <input type="checkbox"/>            | <input checked="" type="checkbox"/> A statement on whether measurements were taken from distinct samples or whether the same sample was measured repeatedly                                                                                                                                    |
| <input type="checkbox"/>            | <input checked="" type="checkbox"/> The statistical test(s) used AND whether they are one- or two-sided<br><i>Only common tests should be described solely by name; describe more complex techniques in the Methods section.</i>                                                               |
| <input type="checkbox"/>            | <input checked="" type="checkbox"/> A description of all covariates tested                                                                                                                                                                                                                     |
| <input type="checkbox"/>            | <input checked="" type="checkbox"/> A description of any assumptions or corrections, such as tests of normality and adjustment for multiple comparisons                                                                                                                                        |
| <input type="checkbox"/>            | <input checked="" type="checkbox"/> A full description of the statistical parameters including central tendency (e.g. means) or other basic estimates (e.g. regression coefficient) AND variation (e.g. standard deviation) or associated estimates of uncertainty (e.g. confidence intervals) |
| <input type="checkbox"/>            | <input checked="" type="checkbox"/> For null hypothesis testing, the test statistic (e.g. $F$ , $t$ , $r$ ) with confidence intervals, effect sizes, degrees of freedom and $P$ value noted<br><i>Give <math>P</math> values as exact values whenever suitable.</i>                            |
| <input checked="" type="checkbox"/> | <input type="checkbox"/> For Bayesian analysis, information on the choice of priors and Markov chain Monte Carlo settings                                                                                                                                                                      |
| <input checked="" type="checkbox"/> | <input type="checkbox"/> For hierarchical and complex designs, identification of the appropriate level for tests and full reporting of outcomes                                                                                                                                                |
| <input checked="" type="checkbox"/> | <input type="checkbox"/> Estimates of effect sizes (e.g. Cohen's $d$ , Pearson's $r$ ), indicating how they were calculated                                                                                                                                                                    |

*Our web collection on [statistics for biologists](#) contains articles on many of the points above.*

### Software and code

Policy information about [availability of computer code](#)

Data collection

The mass spectrometry proteomics data are available at the ProteomeXchange Consortium via the PRIDE (<https://doi.org/10.1093/nar/gky1106>) partner repository with the dataset identifier PXD014980. DESI-MS data were deposited at <https://data.mendeley.com/datasets/zr5rk7vj5/1>

Data analysis

<https://reactome.org/> and <https://www.pathwaystudio.com/> for pathway analysis. glmnet package in R(34) was used to create a ridge regression model for the classification of treatment response. Metaboanalyst 5.0 was used for sparse partial least squares discriminant analysis

For manuscripts utilizing custom algorithms or software that are central to the research but not yet described in published literature, software must be made available to editors and reviewers. We strongly encourage code deposition in a community repository (e.g. GitHub). See the Nature Portfolio [guidelines for submitting code & software](#) for further information.

## Data

Policy information about [availability of data](#)

All manuscripts must include a [data availability statement](#). This statement should provide the following information, where applicable:

- Accession codes, unique identifiers, or web links for publicly available datasets
- A description of any restrictions on data availability
- For clinical datasets or third party data, please ensure that the statement adheres to our [policy](#)

The mass spectrometry proteomics data are available at the ProteomeXchange Consortium via the PRIDE (<https://doi.org/10.1093/nar/gky1106>) partner repository with the dataset identifier PXD014980.

DESI-MS data were deposited at <https://data.mendeley.com/datasets/zsr5rk7vj5/1>

## Human research participants

Policy information about [studies involving human research participants and Sex and Gender in Research](#).

Reporting on sex and gender

Patients were all female.

Population characteristics

population characteristics are reported in ST1

Recruitment

All patients available were selected according to the inclusion criteria

Ethics oversight

The study was approved by the Institutional Review Board of The University of Texas MD Anderson Cancer Center, and all samples were collected after obtaining written informed consent from patients (PA11-1015\_CR003). For the collection of tissues from GYN-COE, patients provided broad consent for their tissues to be used in future research under WCG IRB Protocol #20110222, Tissue and Data Acquisition Activity for the Study of Gynecologic Disease; The paired tumor specimens and clinical data were collaboratively evaluated under WCG IRB Protocol #14-1679, an Integrated Molecular Analysis of Endometrial Cancer, Ovarian Cancer, and Other Medical Conditions to Identify and Validate Clinically Informative Biomarkers and Factors, and the fully executed Material Transfer Agreement #205-20. For the collection from Washington University the study was approved by the Institutional Review Board of the University of Iowa (protocol #201507805).

Note that full information on the approval of the study protocol must also be provided in the manuscript.

## Field-specific reporting

Please select the one below that is the best fit for your research. If you are not sure, read the appropriate sections before making your selection.

Life sciences  Behavioural & social sciences  Ecological, evolutionary & environmental sciences

For a reference copy of the document with all sections, see [nature.com/documents/nr-reporting-summary-flat.pdf](https://www.nature.com/documents/nr-reporting-summary-flat.pdf)

## Life sciences study design

All studies must disclose on these points even when the disclosure is negative.

Sample size

Sample size was sufficient to detect statistically significant SAM differences between the groups

Data exclusions

After passing quality check on tumor sections, no data were excluded from the analysis

Replication

DESI MS was not performed in duplicate since prior studies have evaluated its reproducibility on serial sections. Cell viability experiment (MTT) after GLDC knock down was performed in three biological replicates, each replicate had at least three technical replicates per condition. RT pcr was performed in three technical replicates

Randomization

patients were allocated in the ER and PR groups according to their response to NACT

Blinding

It was not possible to conduct the analysis blindly due to the explanatory codes provided for each sample. The allocation of each sample in the ER and PR group did not bias the analysis at any step due to the exploratory nature of the experimental design.

## Reporting for specific materials, systems and methods

We require information from authors about some types of materials, experimental systems and methods used in many studies. Here, indicate whether each material, system or method listed is relevant to your study. If you are not sure if a list item applies to your research, read the appropriate section before selecting a response.

## Materials &amp; experimental systems

|                                     |                                                           |
|-------------------------------------|-----------------------------------------------------------|
| n/a                                 | Involvement in the study                                  |
| <input checked="" type="checkbox"/> | <input type="checkbox"/> Antibodies                       |
| <input type="checkbox"/>            | <input checked="" type="checkbox"/> Eukaryotic cell lines |
| <input checked="" type="checkbox"/> | <input type="checkbox"/> Palaeontology and archaeology    |
| <input checked="" type="checkbox"/> | <input type="checkbox"/> Animals and other organisms      |
| <input type="checkbox"/>            | <input checked="" type="checkbox"/> Clinical data         |
| <input checked="" type="checkbox"/> | <input type="checkbox"/> Dual use research of concern     |

## Methods

|                                     |                                                 |
|-------------------------------------|-------------------------------------------------|
| n/a                                 | Involvement in the study                        |
| <input checked="" type="checkbox"/> | <input type="checkbox"/> ChIP-seq               |
| <input checked="" type="checkbox"/> | <input type="checkbox"/> Flow cytometry         |
| <input checked="" type="checkbox"/> | <input type="checkbox"/> MRI-based neuroimaging |

## Eukaryotic cell lines

Policy information about [cell lines and Sex and Gender in Research](#)

|                                                                      |                                                                                                                                                                                                                                                                                                                                                                                                                                                                                                                                                                                                                                    |
|----------------------------------------------------------------------|------------------------------------------------------------------------------------------------------------------------------------------------------------------------------------------------------------------------------------------------------------------------------------------------------------------------------------------------------------------------------------------------------------------------------------------------------------------------------------------------------------------------------------------------------------------------------------------------------------------------------------|
| Cell line source(s)                                                  | All ovarian cancer cell lines were obtained from the American Type Culture Collection or the MD Anderson Characterized Cell Line Core Facility, which supplies authenticated cell lines. OVCAR8ip2 was derived from 2 consecutive intraperitoneal injections in nude mice after first injection and tumor formation, while SKOV3ip1 was derived from 1 consecutive intraperitoneal injection in nude mice after first injection and tumor formation. The immortalized non-transformed human ovarian surface epithelial cell line HIO-180 was a kind gift from Dr. Andrew Godwin at the Fox Chase Cancer Center (Philadelphia, PA). |
| Authentication                                                       | All ovarian cancer cell lines were obtained from the American Type Culture Collection and the MD Anderson Characterized Cell Line Core Facility, which supplies authenticated cell lines via Short Tandem Repeat (STR) DNA profiling                                                                                                                                                                                                                                                                                                                                                                                               |
| Mycoplasma contamination                                             | cell lines tested negative for mycoplasma                                                                                                                                                                                                                                                                                                                                                                                                                                                                                                                                                                                          |
| Commonly misidentified lines<br>(See <a href="#">ICLAC</a> register) | <i>Name any commonly misidentified cell lines used in the study and provide a rationale for their use.</i>                                                                                                                                                                                                                                                                                                                                                                                                                                                                                                                         |

## Clinical data

Policy information about [clinical studies](#)

All manuscripts should comply with the ICMJE [guidelines for publication of clinical research](#) and a completed [CONSORT checklist](#) must be included with all submissions.

|                             |                                                                                                                                                                                                                                                                                                                                                       |
|-----------------------------|-------------------------------------------------------------------------------------------------------------------------------------------------------------------------------------------------------------------------------------------------------------------------------------------------------------------------------------------------------|
| Clinical trial registration | <i>Provide the trial registration number from <a href="#">ClinicalTrials.gov</a> or an equivalent agency.</i>                                                                                                                                                                                                                                         |
| Study protocol              | Samples were collected under the study protocol # PA11-1015_CR003                                                                                                                                                                                                                                                                                     |
| Data collection             | Data were collected at the university of Texas MD Anderson Cancer Center, dept of Gynecologic Oncology and Reproductive Medicine, at the Gynecologic Cancer Translational Research Center of Excellence (GYN-COE) and at Washington University, St. Louis, as part of a collaborative study with the University of Iowa and MD Anderson Cancer Center |
| Outcomes                    | Outcome measures were defined based on RECIST criteria defining response to 3-4 cycles of NACT                                                                                                                                                                                                                                                        |
